# Supplementary material
Source: Springer Nature journal article supplement (https://www.springermedizin.de/resource/supplementary/13012_2013_666_MOESM1_ESM.pdf/9630462)
Supplement: MOESM1 [file 9630462]

## Proposed shift from Low Autonomy to High Autonomy for recovery-consistent practice following values-focused staff interventions

Example of CRM practice: "Working collaboratively with individuals in recovery"

**Low Autonomy**

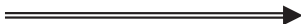

**High Autonomy**

"I collaborate with the individuals I support as my work is evaluated on this basis" I will be

"I collaborate with the individuals I support as it is important in my role and workplace"

"I collaborate with the individuals I support as it is part of my job, and I believe it is important"

"I collaborate with the individuals I support as it is important to me and what I value"

"I collaborate with the individuals I support as the process itself is enjoyable and rewarding"

## Proposed resultant motivation toward and uptake of recovery-consistent practice

External regulation:

Low Self Determination  
No meaningful Transfer into practice

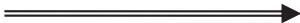

Internal Regulation:

Self-determined behaviour:  
Higher Transfer into practice
